# Supplementary material
Source: PubMed Central journal article supplement (PMC4898761)
Supplement: NIHMS698822-supplement-1.pdf [file NIHMS698822-supplement-1.pdf]

I.

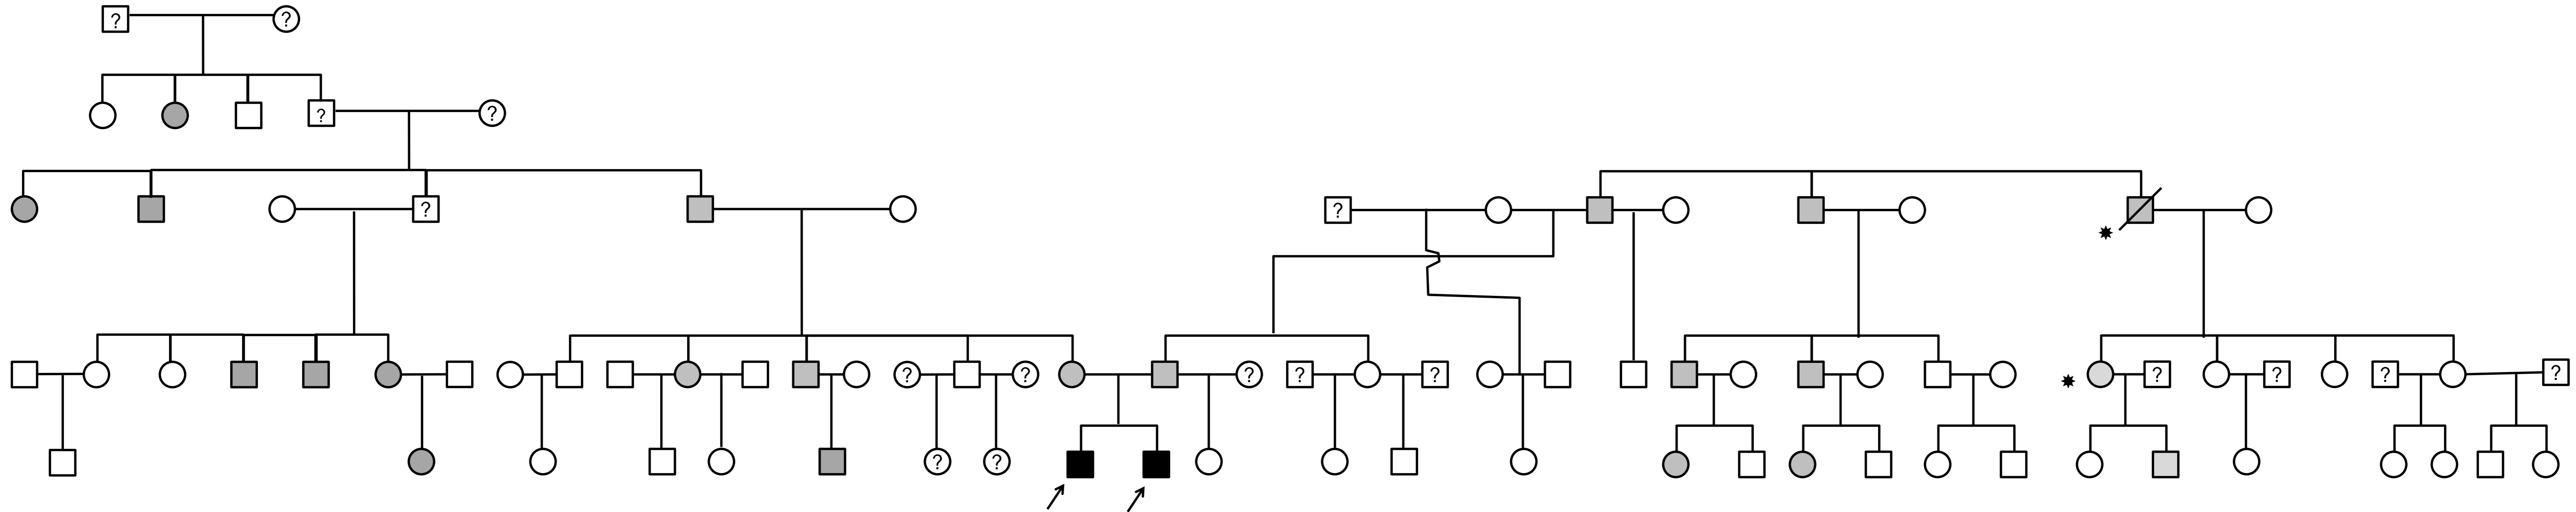

**Supplemental figure 1:** The largest Brazilian family with *STAT5B* c.424\_427del mutation. Subjects homozygous for *STAT5B* c.424\_427del mutation are indicated by black symbols; heterozygous carriers by gray symbols and wild-type by white symbols. The symbol \* refers to two individuals with severe pneumopathy of unknown etiology.
